# Supplementary material
Source: PubMed Central journal article supplement (PMC5121036)
Supplement: NIHMS786832-supplement-01.pdf [file NIHMS786832-supplement-01.pdf]

SUPPLEMENT

Institutional and Tribal Review Boards consulted for the Strong Heart Stroke Study

|                                                  |                                                   |
|--------------------------------------------------|---------------------------------------------------|
| Coordinating & Data Centers                      | University of Washington Human Subjects IRB       |
|                                                  | Cornell Medical College IRB                       |
| Northern Plains: Field Center<br>in South Dakota | Aberdeen Area IHS IRB                             |
|                                                  | Rapid City Regional Hospital IRB                  |
|                                                  | Cheyenne River Tribal Review Board                |
|                                                  | Oglala Sioux Tribal Review Board                  |
| Southern Plains: Field Center<br>in Oklahoma     | Oklahoma City Area IHS IRB                        |
|                                                  | University of Oklahoma Health Sciences Center IRB |
|                                                  | Southwest Oklahoma Intertribal Health Board       |
| Southwest: Field Center in<br>Arizona            | Phoenix Area IHS IRB                              |
|                                                  | MedStar Health Research Institute IRB             |
|                                                  | Salt River Indian Community Tribal Review         |
|                                                  | Gila River Indian Community Tribal Review         |
